# Supplementary material
Source: publisher site journal article supplement (https://www.spandidos-publications.com/8263/downloadSupplementary)

Figure S1. mRNA expression levels of PGM2, DNAH11, NT5DC1, CDK14, IGFBP6, RNFT1, RBBP9, and ZDHHC18 in cholangiocarcinoma and normal tissues. \*P<0.05, \*\*P<0.01 and \*\*\*P<0.001.

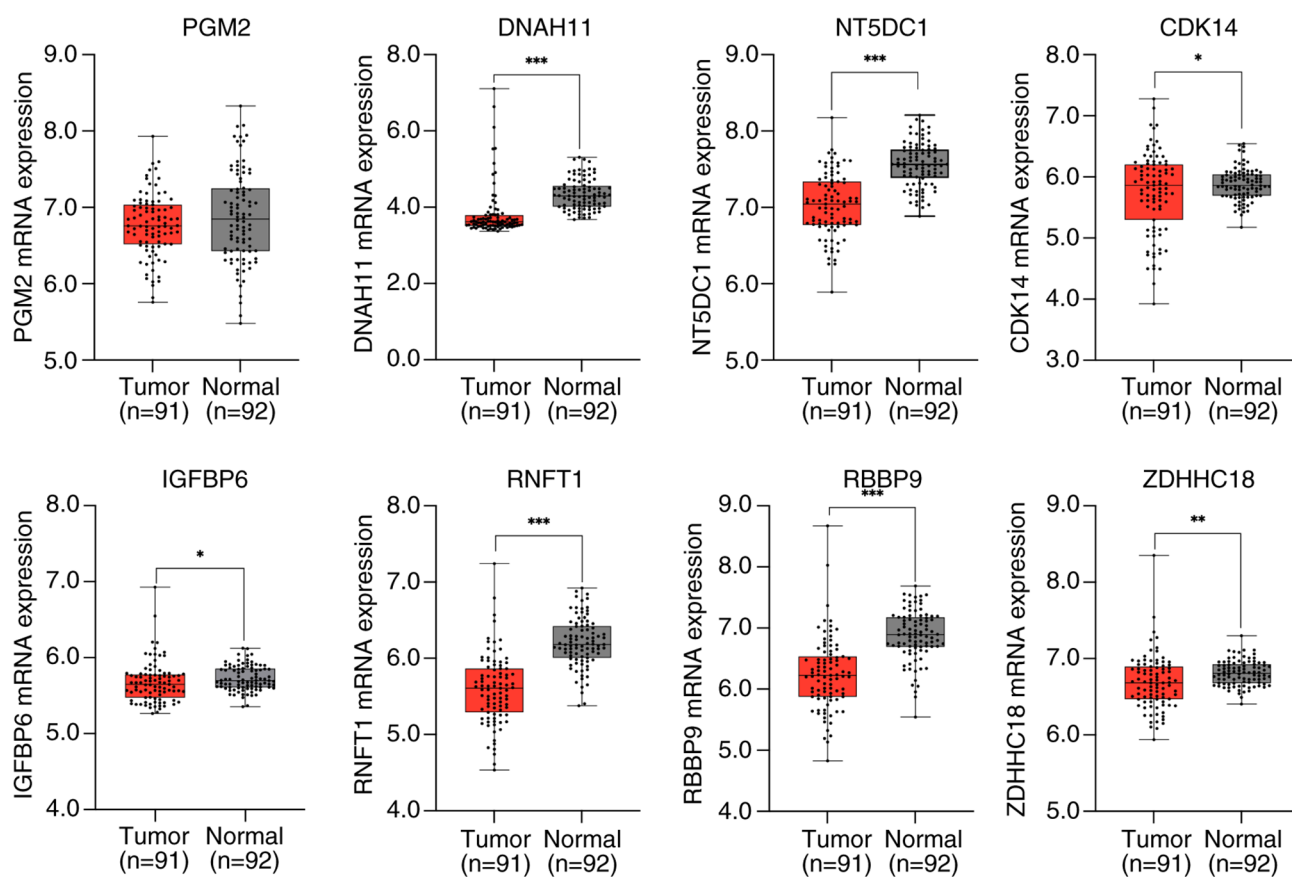

Figure S2. Superimposed structures of RTKN2 constructed from AlphaFold3 (blue) and MD simulation (final snapshot, orange). RTKN2, Rhotekin 2.

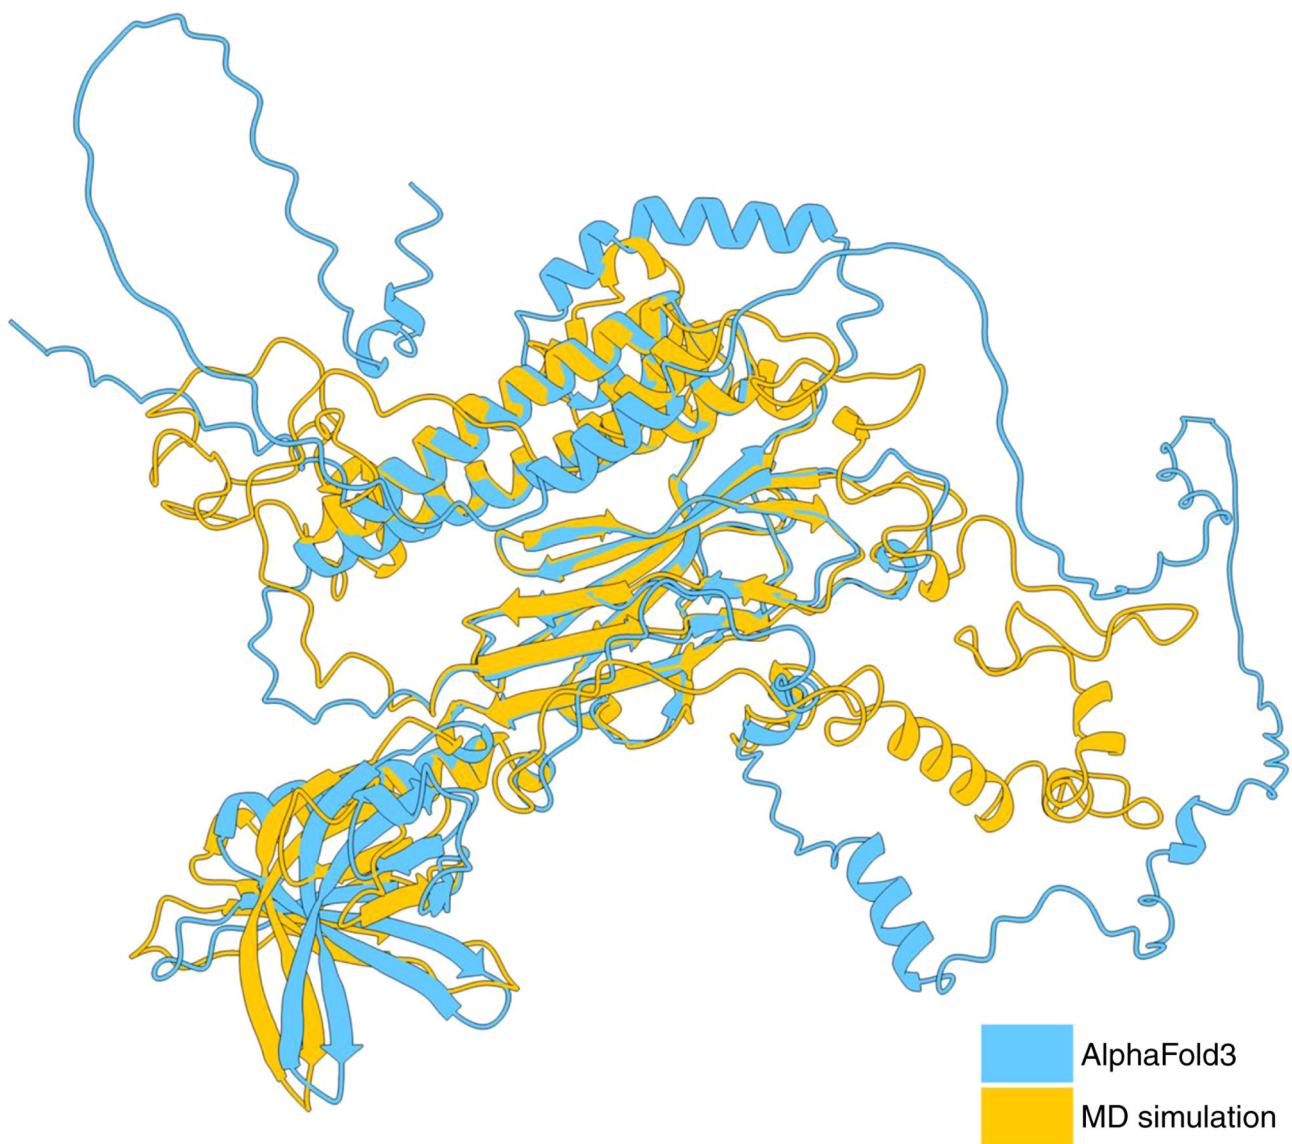

Supplement: Supplementary file 1 [file downloadSupplementary]
